# Supplementary material
Source: publisher site journal article supplement (https://www.dovepress.com/article/336819)
Supplement: Supplementary file 1 [file get_supplementary_file.php]

**Supplementary Table 1** The Mother-to-Infant Bonding Scale

I would like to know how you have been feeling about your baby lately. Listed below are some of the feelings mothers have about their babies. Please underline the answer which comes closest to how you usually feel about your baby, not just how you feel today. Please complete ALL items.

- 1) I feel loving towards my baby
  - Very much so, most of the time
  - Very much so, some of the time
  - Slightly, some of the time
  - Not at all
- 2) I feel scared or panicky when I have to do something for my baby
  - Not at all
  - Slightly, some of the time
  - Very much so, some of the time
  - Very much so, most of the time
- 3) I feel resentful towards my baby
  - Very much so, most of the time
  - Very much so, some of the time
  - Slightly, some of the time
  - Not at all
- 4) I feel nothing for my baby
  - Very much so, most of the time
  - Very much so, some of the time
  - Slightly, some of the time
  - Not at all
- 5) I feel angry with my baby
  - Very much so, most of the time
  - Very much so, some of the time
  - Slightly, some of the time
  - Not at all
- 6) I enjoy doing things for my baby
  - Not at all
  - Slightly, some of the time
  - Very much so, some of the time
  - Very much so, most of the time
- 7) I wish my baby was different

Very much so, most of the time

Very much so, some of the time

Slightly, some of the time

Not at all

8) I feel protective towards my baby

Not at all

Slightly, some of the time

Very much so, some of the time

Very much so, most of the time

9) I wish I did not have my baby

Very much so, most of the time

Very much so, some of the time

Slightly, some of the time

Not at all

10) I feel close to my baby

Not at all

Slightly, some of the time

Very much so, some of the time

Very much so, most of the time

**Note:** Reproduced from Yoshida K, Yamashita H, Conroy S, et al. A Japanese version of mother-to-infant bonding scale: Factor structure, longitudinal changes and links with maternal mood during the early postnatal period in Japanese mothers. *Arch Womens Ment Health*. 2012;15(5):343-352. Creative Commons license and disclaimer available from: <http://creativecommons.org/licenses/by/2.0>.<sup>9</sup>

**Supplementary Table 2** Sensitivity, specificity and Youden index of each cutoff score of the MIBS-J at T1

| Cut off score | <i>n</i> | Sensitivity | Specificity | Youden index |
|---------------|----------|-------------|-------------|--------------|
| 0             | 156      | 1.000       | 0.000       | 0.000        |
| 1             | 190      | 0.992       | 0.184       | 0.176        |
| 2             | 172      | 0.954       | 0.393       | 0.347        |
| 3             | 175      | 0.895       | 0.568       | 0.463        |
| 4             | 138      | 0.813       | 0.733       | 0.546        |
| 5             | 123      | 0.694       | 0.831       | 0.525        |
| 6             | 109      | 0.562       | 0.904       | 0.466        |
| 7             | 77       | 0.430       | 0.960       | 0.390        |
| 8             | 47       | 0.304       | 0.981       | 0.285        |
| 9             | 46       | 0.224       | 0.992       | 0.216        |
| 10            | 18       | 0.138       | 0.998       | 0.136        |
| 11            | 19       | 0.105       | 1.000       | 0.105        |
| 12            | 13       | 0.065       | 1.000       | 0.065        |
| 13            | 8        | 0.038       | 1.000       | 0.038        |
| 14            | 2        | 0.021       | 1.000       | 0.021        |
| 15            | 4        | 0.017       | 1.000       | 0.017        |
| 16            | 1        | 0.008       | 1.000       | 0.008        |
| 17            | 1        | 0.006       | 1.000       | 0.006        |
| 18            | 1        | 0.004       | 1.000       | 0.004        |
| 19            | 1        | 0.002       | 1.000       | 0.002        |

MIBS-J, Mother-to-Infant Bonding Scale-Japanese version; T1, first trimester.

**Supplementary Table 3** Sensitivity, specificity and Youden index of each cutoff score of the MIBS-J at T2

| Cut off score | <i>n</i> | Sensitivity | Specificity | Youden index |
|---------------|----------|-------------|-------------|--------------|
| 0             | 235      | 1.000       | 0.000       | 0.000        |
| 1             | 223      | 0.975       | 0.271       | 0.245        |
| 2             | 182      | 0.925       | 0.512       | 0.437        |
| 3             | 194      | 0.836       | 0.682       | 0.519        |
| 4             | 145      | 0.717       | 0.848       | 0.565        |
| 5             | 94       | 0.572       | 0.941       | 0.513        |
| 6             | 94       | 0.449       | 0.983       | 0.432        |
| 7             | 49       | 0.275       | 0.996       | 0.271        |
| 8             | 33       | 0.174       | 0.998       | 0.172        |
| 9             | 14       | 0.107       | 0.999       | 0.106        |
| 10            | 16       | 0.078       | 0.999       | 0.076        |
| 11            | 12       | 0.044       | 0.999       | 0.043        |
| 12            | 5        | 0.021       | 1.000       | 0.021        |
| 13            | 3        | 0.010       | 1.000       | 0.010        |
| 15            | 1        | 0.004       | 1.000       | 0.004        |
| 16            | 1        | 0.002       | 1.000       | 0.002        |

MIBS-J, Mother-to-Infant Bonding Scale-Japanese version; T2, third trimester.

**Supplementary Table 4** Sensitivity, specificity and Youden index of each cutoff score of the MIBS-J at T3

| Cut off score | <i>n</i> | Sensitivity | Specificity | Youden index |
|---------------|----------|-------------|-------------|--------------|
| 0             | 411      | 1.000       | 0.000       | 0.000        |
| 1             | 308      | 0.878       | 0.428       | 0.307        |
| 2             | 197      | 0.753       | 0.729       | 0.482        |
| 3             | 124      | 0.612       | 0.887       | 0.499        |
| 4             | 85       | 0.478       | 0.960       | 0.438        |
| 5             | 66       | 0.350       | 0.989       | 0.339        |
| 6             | 37       | 0.226       | 0.998       | 0.224        |
| 7             | 20       | 0.153       | 1.000       | 0.153        |
| 8             | 15       | 0.111       | 1.000       | 0.111        |
| 9             | 15       | 0.080       | 1.000       | 0.080        |
| 10            | 5        | 0.048       | 1.000       | 0.048        |
| 11            | 7        | 0.038       | 1.000       | 0.038        |
| 12            | 3        | 0.023       | 1.000       | 0.023        |
| 13            | 2        | 0.017       | 1.000       | 0.017        |
| 14            | 2        | 0.013       | 1.000       | 0.013        |
| 16            | 2        | 0.008       | 1.000       | 0.008        |
| 17            | 1        | 0.004       | 1.000       | 0.004        |
| 18            | 1        | 0.002       | 1.000       | 0.002        |

MIBS-J, Mother-to-Infant Bonding Scale-Japanese version; T3, 1 month postpartum.
